# Supplementary material for: Serum procalcitonin concentration within 2 days postoperatively accurately predicts outcome after liver resection
Source: publisher site journal article supplement (doi:10.1515/cclm-2018-0196), 2018-04-12
Supplement: Supplementary file 1 [file cclm-2018-0196_suppl.docx]

**Supplemental Table 1.** Changes in WBC count, CRP level, and PCT level

|  | All patients  (n = 72) | Postoperative complications | | | *p* value |
| --- | --- | --- | --- | --- | --- |
|  | No (n = 47, 65%) | Yes (n = 25, 35%) |  | |
| POD 1 |  |  |  |  | |
| WBC, /µl | 10500 (7600–12900), 72 (100) | 9400 (7500–12200), 47 (100) | 11100 (8000–13500), 25 (100) | 0.145 | |
| CRP, mg/dl | 2.33 (1.52–3.47), 72 (100) | 2.04 (1.15–3.05), 47 (100) | 2.67 (2.26–4.47), 25 (100) | 0.006** | |
| PCT, ng/ml | 0.21 (0.13–0.45), 70 (97) | 0.17 (0.09–0.26), 45 (96) | 0.50 (0.29–0.88), 25 (100) | <0.001** | |
| POD 2 |  |  |  |  | |
| WBC, /µl | 10400 (7500–12600), 71 (99) | 10000 (7500–12100), 47 (100) | 10900 (7600–15500), 24 (96) | 0.185 | |
| CRP, mg/dl | 6.03 (3.63–9.72), 71 (99) | 5.70 (2.44–8.26), 47 (100) | 8.17 (5.62–11.50), 24 (96) | 0.011* | |
| PCT, ng/ml | 0.25 (0.13–0.44), 69 (95) | 0.17 (0.10–0.30), 46 (98) | 0.51 (0.28–0.95), 23 (92) | <0.001** | |
| POD 3 |  |  |  |  | |
| WBC, /µl | 8100 (6600–11000), 72 (100) | 8000 (6900–10600), 47 (100) | 8100 (6600–12200), 25 (100) | 0.827 | |
| CRP, mg/dl | 7.78 (4.77–11.16), 72 (100) | 7.11 (3.31–10.03), 47 (100) | 9.87 (6.17–14.71), 25 (100) | 0.037* | |
| PCT, ng/ml | 0.20 (0.10–0.42), 70 (97) | 0.15 (0.09–0.21), 46 (98) | 0.45 (0.23–0.67), 24 (96) | <0.001** | |
| POD 5 |  |  |  |  | |
| WBC, /µl | 6300 (5000–7700), 72 (100) | 6300 (4800–7700), 47 (100) | 5900 (5000–7900), 25 (100) | 0.981 | |
| CRP, mg/dl | 2.73 (1.67–4.44), 72 (100) | 2.51 (1.37–4.26), 47 (100) | 3.77 (2.26–7.45), 25 (100) | 0.025* | |
| PCT, ng/ml | 0.11 (0.06–0.23), 71 (99) | 0.09 (0.05–0.14), 46 (98) | 0.23 (0.13–0.34), 25 (100) | <0.001** | |
| POD 7 |  |  |  |  | |
| WBC, /µl | 6900 (5300–8400), 67 (93) | 6700 (5200–7700), 42 (89) | 8400 (5400–9000), 25 (100) | 0.048* | |
| CRP, mg/dl | 2.00 (1.25–3.52), 67 (93) | 1.56 (0.94–3.09), 42 (89) | 3.10 (1.54–4.79), 25 (100) | 0.012* | |
| PCT, ng/ml | 0.09 (0.06–0.14), 67 (93) | 0.06 (0.05–0.12), 42 (89) | 0.13 (0.09–0.20), 25 (100) | 0.002** | |
| Peak increase |  |  |  |  | |
| WBC, /µl | 11100 (9100–13500) | 10700 (9200–13200) | 12600 (8900–16200) | 0.183 | |
| CRP, mg/dl | 7.99 (5.39–12.84) | 7.11 (3.87–11.19) | 9.87 (6.53–15.04) | 0.027* | |
| PCT, ng/ml | 0.30 (0.13–0.58) | 0.20 (0.12–0.32) | 0.59 (0.36–1.00) | <0.001** | |

Data are presented as median (interquartile range) and n (%).

POD, postoperative day; WBC, white blood cell; CRP, C-reactive protein; PCT, procalcitonin.

**p* < 0.05, ***p* < 0.01.

1 L = 0.001 m3, 1 min = 60 s, 1 day = 86,400 s.
